# Supplementary material for: Complexity of the 5′UTR region of the CLCN5 gene: eleven 5′UTR ends are differentially expressed in the human kidney
Source: PubMed Central journal article supplement (PMC4105828; doi:10.1186/1755-8794-7-41), 2014-07-07
Supplement: 1755-8794-7-41-S1.pdf [file 1755-8794-7-41-S1.pdf]

## ADDITIONAL FILE 1

**Primers used for amplification of *CLCN5* 5' cDNA ends.** The table report the sequence of adaptor GeneRacer 5' primers supplied with the kit and the sequence of specific *CLCN5* gene antisense primers.

| <i>PRIMER</i>              | <i>SEQUENCE</i><br>(5' → 3') |
|----------------------------|------------------------------|
| GeneRacer 5' primer        | CGACTGGAGCACGAGGACACTGA      |
| r RACE Ex 2                | ACACCAGGGATTGGCTCCTCCAAGAA   |
| GeneRacer 5' nested primer | GGACACTGACATGGACTGAAGGAGTA   |
| r RACE Ex 2 bis            | CTCTCGGTGCCTATCCCGGTCTCGAG   |
| r RACE cn 1-2              | ACCATTGTACGACTTGTCCTCTGTATTG |
| r RACE sz 1-2              | CCATTGTACGACTTGTCCTCTGGTAGG  |
| r RACE 1c                  | AGGGACAAGGCTTCCTCCAGACTGTTT  |
