# Supplementary material for: Complexity of the 5′UTR region of the CLCN5 gene: eleven 5′UTR ends are differentially expressed in the human kidney
Source: PubMed Central journal article supplement (PMC4105828; doi:10.1186/1755-8794-7-41), 2014-07-07
Supplement: 1755-8794-7-41-S2.pdf [file 1755-8794-7-41-S2.pdf]

## ADDITIONAL FILE 2

**Primers used for RT/PCR analysis of CLCN5 mRNAs.** The mRNA species amplified, the amplicon length and the PCR conditions are reported. Some primer pairs co-amplified different CLCN5 mRNA species.

| <i>EXON</i>            | <i>PRIMER PAIRS</i><br>(5' → 3')                                            | <i>mRNA variants</i>         | <i>AMPLICON</i><br>(bp)    | <i>T annealing</i><br>(°C) | <i>MgCl<sub>2</sub></i><br>(mM) | <i>cycle numbers</i> |
|------------------------|-----------------------------------------------------------------------------|------------------------------|----------------------------|----------------------------|---------------------------------|----------------------|
| Ex I/II F<br>Ex IV/2 R | <i>f</i> : CCTCGGCGACAGAGCAAATC<br><i>r</i> : TTGTCCTCTCCTACTTCTCGG         | 1 + 2                        | 386 + 645                  | 64                         | 3                               | 38                   |
| Ex 1a F<br>Ex 4 R      | <i>f</i> : AGGCAGAGAATGCAGCAAGT<br><i>r</i> : CATGCTCAGAGTTCCAGCAA          | 3                            | 512                        | 60                         | 1.5                             | 35                   |
| Ex 1b F<br>Ex 4 R      | <i>f</i> : GACCCTTTTGTCTCCCTTCC<br><i>r</i> : CATGCTCAGAGTTCCAGCAA          | 4 + alternative 4            | 586 + 720                  | 60                         | 1.5                             | 35                   |
| 5'UTR b F<br>Ex 4 R    | <i>f</i> : GGCATGCTGACTTAGGTATTCA<br><i>r</i> : CATGCTCAGAGTTCCAGCAA        | 6 + 7 +<br>4 + alternative 4 | 417 + 602 +<br>1560 + 1694 | 62                         | 2                               | 40                   |
| Ex I/II F<br>Ex VI/2 R | <i>f</i> : CCTCGGCGACAGAGCAAATC<br><i>r</i> : CGACTTGTCTCTGGAGTAGAA         | 8 + 9 + 10 + 11              | 584 + 715 + 843<br>+ 974   | 58                         | 2                               | 38                   |
| Ex 2-3 F<br>Ex 6R      | <i>f</i> : TAGGCACCGAGAGATTACCAAT<br><i>r</i> : GATGTTCCACAGCAGCAAGC        | Translated region            | 580                        | 60                         | 1.5                             | 35                   |
| GAPDH F<br>GAPDH R     | <i>f</i> : TGAAGGTCCGAGTCAACGGATTGGT<br><i>r</i> : CATGTGGGCCATGAGGTCCACCAC | GAPDH                        | 983                        | 60                         | 1.5                             | 30                   |
