# Supplementary material for: Complexity of the 5′UTR region of the CLCN5 gene: eleven 5′UTR ends are differentially expressed in the human kidney
Source: PubMed Central journal article supplement (PMC4105828; doi:10.1186/1755-8794-7-41), 2014-07-07
Supplement: 1755-8794-7-41-S3.pdf [file 1755-8794-7-41-S3.pdf]

### ADDITIONAL FILE 3

**Primers used for Real Time PCR analysis of 5' *CLCN5* isoforms.** The mRNA species and the size of the PCR products are reported.

| <b>EXON</b>              | <b>PRIMER</b><br>(5' → 3')                                            | <b>mRNA variants</b> | <b>AMPLICON (bp)</b> |
|--------------------------|-----------------------------------------------------------------------|----------------------|----------------------|
| Ex 1a/2 F<br>Ex 2 R      | <i>f</i> : TGTGATTGAAGAGGACAAGTCG<br><i>r</i> : AGGTCCCTACACCAGGGATT  | 3                    | 98                   |
| Ex 1b/2 F<br>Ex 2R       | <i>f</i> : TTCCTACCAGAGGACAAGTCG<br><i>r</i> : AGGTCCCTACACCAGGGATT   | 4                    | 97                   |
| Ex 1b1/2 F<br>Ex 2R      | <i>f</i> : CAATACAGAGGACAAGTCG<br><i>r</i> : AGGTCCCTACACCAGGGATT     | alternative 4        | 92                   |
| Ex c.1/2 F<br>Ex 2 R     | <i>f</i> : ACCAATTAGGACAAGTCG<br><i>r</i> : AGGTCCCTACACCAGGGATT      | 6                    | 91                   |
| Ex c/2 F<br>Ex 2 R       | <i>f</i> : CTGCCAAGAGGACAAGTCG<br><i>r</i> : AGGTCCCTACACCAGGGATT     | 7                    | 92                   |
| Ex IIa/III F<br>Ex III R | <i>f</i> : TGCCCCGAGTTTGGGGCTTT<br><i>r</i> : AGAGCCTCTCAGTTTTGTAGGG  | 2 + 8 + 10           | 90                   |
| Ex IIb/III F<br>Ex III R | <i>f</i> : AGGAGTTTGTGGGGCTTT<br><i>r</i> : AGAGCCTCTCAGTTTTGTAGGG    | 1 + 9 + 11           | 90                   |
| Ex 3/4 F<br>Ex 4 R       | <i>f</i> : TTTATCAGGTTTCGTTAGCTGG<br><i>r</i> : CTCTTCAAAGGTGACATGCTC | Translated region    | 99                   |
| GAPDH F<br>GAPDH R       | <i>f</i> : GAAGGTGAAGGTTCGGAGT<br><i>r</i> : TGGCAACAATATCCACTTTACCA  | GAPDH                | 92                   |
