# Supplementary material for: Complexity of the 5′UTR region of the CLCN5 gene: eleven 5′UTR ends are differentially expressed in the human kidney
Source: PubMed Central journal article supplement (PMC4105828; doi:10.1186/1755-8794-7-41), 2014-07-07
Supplement: 1755-8794-7-41-S4.pdf [file 1755-8794-7-41-S4.pdf]

## ADDITIONAL FILE 4

**Sequence of extended 5' UTR ends of the known *CLC-5* transcripts (type 3, 4 and alternative 4) and sequence of the newly identified *CLCN5* 5'UTR variants (types 6-11).** The alternative splice sites are indicated (\*).

### mRNA variant 3

EXTENDED  
EXON 1a (242 bp) GCTGGTCCAAAGGTCTGGTCACGTGACTCCAACAGTGACATCACATTCTGACCGCCAGGG  
AACACTGGTAGTTCTTTAGGTGGCGTTTTGTTGCTGTGAAAGGCAGAGAATGCAGCAAGTG  
CCCTTCTAAAGCACTTCAGACTGGGGCTTCTTTTGTAAAAGCTCCCCAACCTGAATGACC  
AAATGCGGGCTGCCAAGGTTATTTCTTCTTGGAGGCAGAAAAAAGAAAACTGTGATTGA  
AG  
EXON 2 (152 bp) AGGACAAGTCGTACAATGGTGGAGGAATAGGTTCTTCAAATAGGATCATGGACTTCTTGG  
AGGAGCCAATCCCTGGTGTAGGGACCTATGATGATTCAATACAATTGATTGGGTGAGAG  
AGAAGTCTCGAGACCGGGATAGGCACCGAGAG

### mRNA variant 4 and alternative variant 4

ATGATTTGGACTCTGCAGAGCTTTTTCTTTCAAATGTGCACCTTGCCTGTGAAAGGCATG  
CTGACTTAGGTATTCAGAAGACTTACAATTGGTAAACCAATTGTAAGTACAGCTTGGGGT  
GTTCTTCAAACCTTTCCCATGACATTGCTAAAGTTGTCTGTTTGGAGTTTACAGTGAAG  
ATGGGGATGCAGATGGGAGGAGAGGGAGTCAGCTCAGGCCCACTTTGGCCTCCTCTGCAG  
AGGGATTCATTACCAAACAGTCTGGAGGAAGCCTTGTCCCTGCCAAGGTTGGTGTGCAA  
ATGTGAGCTTTGGCTGGGTGAATTAATGATGGCATTACTCTGCACTTTTTCCCAAGTGTG  
CATTTGCATAGATTCCCTCAGTACTGTTTTGTATTTTGTGTTAATAGCAAAAATCTTATTC  
CATCAGATGATGTTGCTGAAATATTTTGAATCAAGTTTAAAGCCTTGTGTGAGTATAGCTT  
GTGAGTTTAAAACCTTCTCCCCCATTTCCACCGTTTCATCAAACAAATTTTGGTTCAGCTG  
ATATATACTGATTCTTGGATATGTGCTAGACACTGTAGAGAAGGGAACGATGAATCAGAC  
EXENDED  
EXON 1b (1001 bp) ATCAGGCTACCAGCAAAGAGCTTGTAGTCTAGAAAAGGAAGATAAAGCATGCACAAAAGTA  
ATTGTAATAGAAGTACCCAAAGCAAAGTAGATAAGGGACTATGATGGGTGGGCAGGTGGA  
TATGTTTCTTGCAGTTGAAGGATCAGGGAGGGACATTTTCATCACTGAATCATACTGTT  
CTTTAAATCTCTGCTTGTAAATCTTAGACTGTGCTGACATACTTAGAGTTCCCTACAAGCC  
TGTTACATCAGAGATCAAGTCTTATACCTATTGAAGGGAAATTTGTACATCCAGCCAAC  
TAACTCGTGAAGAGGCCACATGCTTTATTTGGAGTCCCCAGCCAGGCAAAAACCACTT  
CATAGGATTGAATTATTGCCTTATAAATGTAAAATGGTTCT  
TGATGTGATATGGCTGCAAGTGCCTTTGACCCTTTTGTCTCCCTCCATAAACTGAAATA  
EXON 1b (244 bp) TGATGTGATATGGCTGCAAGTGCCTTTGACCCTTTTGTCTCCCTCCATAAACTGAAATA  
CCTAAGCTGCTCCAACCTCCTTTTTGTCTTTTGTTCATAAATCCTTTCCATTGCACAT  
CAACTCCTGTCTCTCTTTGTACTGTCACTCTCATCTGTTGCTTTCCATTACACTGCCTT  
TAGCCACTCATCATTTTGTGCCTACACCACAGAAACCTCTGAATGTAATGGATGTTCTTA  
CCAG\*  
GTGACTGTATTCTTTATCAACCCCACTGTAGTCATCTGATAGTTAAGGGCCCGCCTT  
INTRON 1-2 (134 bp) TTGGAACCAAAAAGAATGTATTAATAAATGTTAAGAATTTCTGAAGTACTAATGTCTATTT  
CTTGTTCAATACAG  
AGGACAAGTCGTACAATGGTGGAGGAATAGGTTCTTCAAATAGGATCATGGACTTCTTGG  
EXON 2 (152 bp) AGGAGCCAATCCCTGGTGTAGGGACCTATGATGATTCAATACAATTGATTGGGTGAGAG  
AGAAGTCTCGAGACCGGGATAGGCACCGAGAG

### mRNA variants 6 and 7

ATGATTTGGACTCTGCAGAGCTTTTTCTTTCAAATGTGCACCTTGCCTGTGAAAGGCATG  
CTGACTTAGGTATTCAGAAGACTTACAATTGGTAAACCAATT\*GTAAGTACAGCTTGGGGT

EXON c (287 bp) GTTCCTTCAAACCTTCCCATGACATTGCTAAAGTTGTCTGTTTGGAGTTTACAGTGAAG  
 ATGGGGATGCAGATGGGAGGAGAGGGAGTCAGCTCAGGCCACTTGGCCCTCCTCTGCAG  
 AGGGATTCATTACCAAACAGTCTGGAGGAAGCCCTGTCCCTGCCAAG  
 EXON 2 (152 bp) AGGACAAGTCGTACAATGGTGGAGGAATAGTTCTTCAAATAGGATCATGGACTTCTTGG  
 AGGAGCCAATCCCTGGTGTAGGGACCTATGATGATTTCAAATACAATTGATTGGGTGAGAG  
 AGAAGTCTCGAGACCGGGATAGGCACCGAGAG

**mRNA variants 8 and 9**

EXON I (197 bp) GATACTCGCGAGGCGCCCGTCACATGAGCCGCGGCCCTGCTTCGCTCCCCCTCCTCCCC  
 GGCTGGGCTGTGTGAATGAAGCTCTGCCGGCTACGTGGGGCGCTCACTCAACTTGGTGTCT  
 CTGGACGCCAGAGCCGACCGAGCGCGCTGCCACCGGCGGGACACGGGCTCCGCCGCT  
 CCGGACCTCGGCGACAG  
 AGCAAATCAGTTGCCTGGAGTCCAGTGAAGTTGTACCTGTGCCCGTGCATAACGTCA  
 EXON II (335 bp) GTGGAAGCTGCCCCGA \*GTAAGTGAGGAAATCTAGAAGTTTGGAGCATAAAAAACCAGC  
 ACGAATCAACTTTACATAAACTTCATACATTTATTAGCAACTGCTCGGGTTAACTTCAGG  
 GATGTTAAATTTTCGCCTAGTCCCACGGGACGATGATCATTACTTCTTAACTGCACGCGAA  
 ATAGGAGAAGAAAAAGGCAAATCAAACAGACTGTCCCAGGTCTCAGAGAAGTCATCGG  
 AGCGCTTTTTCCTGCTGAATTCACCCTAGGAGTTT  
 EXON III (144 bp) GTTTGGGGCTTTAGCCCCCTGGAGAAAACAGGGCCACATAGCTGCCTTTCTATCAAGTCT  
 CCCTACAAAAGTGAAGGGCTCTGGGAAAACAGCCTGTGACCCAGCGTGGGTGAAGATA  
 GGATCAAGATGGCCATGTGGCAGG  
 EXON IV (147 bp) GTGCCATGGATAACAGAGGCTTTCAGCAGGGGAGTTTTAGTAGCTTCCAGAACAGCTCCA  
 GTGATGAAGACCTGATGGACATTCCAGCAACCGCTATGGATTTCTCCATGAGAGATGATG  
 TTCTCCCTTAGACCGAGAAGTAGGAG  
 EXON VI (194 bp) AGCCAGGAGGGATTCTTAGATCTTCACTGTGAGAAGTTGGTGGGGTTTCTGGATGTAGAG  
 CTTTGGTGTGGGAGCTCCCCAAGACCGTGGTCCCCAAGAGTTTCTTGTACTCACGCCAG  
 TCCACACTCAGCCTTCAGCAGCTTGTTCAGTTGCCATTTGTGTTTCTACCAGCTCCAGC  
 CATTCTACTCCAG  
 EXON 2 (152 bp) AGGACAAGTCGTACAATGGTGGAGGAATAGTTCTTCAAATAGGATCATGGACTTCTTGG  
 AGGAGCCAATCCCTGGTGTAGGGACCTATGATGATTTCAAATACAATTGATTGGGTGAGAG  
 AGAAGTCTCGAGACCGGGATAGGCACCGAGAG

**mRNA variants 10 and 11**

EXON I (197 bp) GATACTCGCGAGGCGCCCGTCACATGAGCCGCGGCCCTGCTTCGCTCCCCCTCCTCCCC  
 GGCTGGGCTGTGTGAATGAAGCTCTGCCGGCTACGTGGGGCGCTCACTCAACTTGGTGTCT  
 CTGGACGCCAGAGCCGACCGAGCGCGCTGCCACCGGCGGGACACGGGCTCCGCCGCT  
 CCGGACCTCGGCGACAG  
 AGCAAATCAGTTGCCTGGAGTCCAGTGAAGTTGTACCTGTGCCCGTGCATAACGTCA  
 EXON II (335 bp) GTGGAAGCTGCCCCGA \*GTAAGTGAGGAAATCTAGAAGTTTGGAGCATAAAAAACCAGC  
 ACGAATCAACTTTACATAAACTTCATACATTTATTAGCAACTGCTCGGGTTAACTTCAGG  
 GATGTTAAATTTTCGCCTAGTCCCACGGGACGATGATCATTACTTCTTAACTGCACGCGAA  
 ATAGGAGAAGAAAAAGGCAAATCAAACAGACTGTCCCAGGTCTCAGAGAAGTCATCGG  
 AGCGCTTTTTCCTGCTGAATTCACCCTAGGAGTTT  
 EXON III (144 bp) GTTTGGGGCTTTAGCCCCCTGGAGAAAACAGGGCCACATAGCTGCCTTTCTATCAAGTCT  
 CCCTACAAAAGTGAAGGGCTCTGGGAAAACAGCCTGTGACCCAGCGTGGGTGAAGATA  
 GGATCAAGATGGCCATGTGGCAGG  
 EXON IV (147 bp) GTGCCATGGATAACAGAGGCTTTCAGCAGGGGAGTTTTAGTAGCTTCCAGAACAGCTCCA  
 GTGATGAAGACCTGATGGACATTCCAGCAACCGCTATGGATTTCTCCATGAGAGATGATG  
 TTCTCCCTTAGACCGAGAAGTAGGAG  
 EXON V (131 bp) TGCCACCAAAGTGTCTGCCAAAGTGCCAAAGTGGCTATACCATTTTGCATTCTACCAGC  
 TATGAATGAGAGTTCTGTAGTTTGCATCCTTGGTATTGTCAGTGTTTTGGATTTTACG  
 CATTCTAATAG  
 EXON VI (194 bp) AGCCAGGAGGGATTCTTAGATCTTCACTGTGAGAAGTTGGTGGGGTTTCTGGATGTAGAG  
 CTTTGGTGTGGGAGCTCCCCAAGACCGTGGTCCCCAAGAGTTTCTTGTACTCACGCCAG  
 TCCACACTCAGCCTTCAGCAGCTTGTTCAGTTGCCATTTGTGTTTCTACCAGCTCCAGC  
 CATTCTACTCCAG  
 EXON 2 (152 bp) AGGACAAGTCGTACAATGGTGGAGGAATAGTTCTTCAAATAGGATCATGGACTTCTTGG  
 AGGAGCCAATCCCTGGTGTAGGGACCTATGATGATTTCAAATACAATTGATTGGGTGAGAG  
 AGAAGTCTCGAGACCGGGATAGGCACCGAGAG
